# Supplementary material for: Studying charge-carrier intercalation/deintercalation in energy storage materials by optical spectroscopy
Source: Research Square preprint supplement (doi:10.21203/rs.3.rs-2213074/v1), 2022-11-02
Supplement: Supplementary file 1 [file b82929e9b00762b6661e2ac4.docx]

Supplementary Information

**Studying charge-carrier intercalation/deintercalation in energy storage materials by optical spectroscopy**

**

**

**Supplementary Figure. 1:** Galvanostatic charge/discharge curves of Co(OH)2 (PVDF was added as binder) at different current densities ranging from 1 to 5 A g–1.

Supplementary Figure.1 shows the GCD curves of the Co(OH)2 nanocomposite electrode measured at different current densities (1, 2, 3, 5 A g–1) in the potential range of 0 V to 0.45 V. All the GCD profiles are nonlinear and show obvious potential plateau, indicating that the charge storage of α-Co(OH)2 electrode with (de-)intercalating ions originated predominantly from Faradaic reaction. In accordance with the formula *Cm =I*×*Δt*/（*ΔV*×*m*）, the device exhibits a specific capacitance of 475 F g–1 at 1 A g–1. Furtherly, the shapes of GCD curves remain unchanged and keep symmetric with current densities increasing from 1 to 5 A g–1, which proves the good reversibility and rate capability of Co(OH)2 electrode.

**

**

**Supplementary Figure. 2:** CV curve of the Co(OH)2 (PVDF was added as binder) testing at 10 mV s–1.

The CV curve of α-Co(OH)2 electrode with scan voltage from –0.3 to +0.5 V and scan rate at 10 mV s–1 shows obvious redox peaks, which corresponds to the potential plateau in GCD curves. The Co(OH)2 electrode showed a remarkable redox couple: oxidation peak (~0.14 V)/reduction peak (0.01 V)，which could be expressed as .

**

**

**Supplementary Figure. 3:** Cycling performance of Co(OH)2 (PVDF was added as binder) at the current density of 20 A g–1 and GCD curves of the last ten cycles during 2000 cycles.

As revealed in Supplementary Figure.3, the capacity loss was only 3.2% after 2000 repeated cycles, demonstrating superior long-term stability while Co(OH)2 (PVDF was added as binder) using as energy storage electrode. The insert shows that after 2000 cycles of charging and discharging, the GCD curve shape remains unchanged and Co(OH)2 has redox reversibility.

**

**

**Supplementary Figure. 4:** Galvanostatic charge/discharge curves of Co(OH)2 (PVDF as binder and SP carbon black as conductive agent) with current densities ranging from 1 to 5 A g–1.

Supercapacitor electrode materials usually add conductive agents to improve the conductivity. The electrode prepared by mixing 80 wt% Co(OH)2, 10 wt% PVDF and 10% super P carbon black (SP) was also tested to illustrate the influence of SP on the electrochemical performance. Supplementary Figure.4 shows the GCD curves of the Co(OH)2 nanocomposite electrode measured at different current densities (1, 2, 3, 5 A g–1) in the potential range of 0 V to 0.45 V. It can be seen that the GCD curves exhibit a nonlinear and symmetrical shape, demonstrating an outstanding coulombic efficiency. The device exhibits a specific capacitance of 620 F g–1 at 1 A g–1. The capacity of Co(OH)2 electrode was improved by adding SP.

**

**

**Supplementary Figure. 5:** CV curve of the Co(OH)2 (PVDF as binder and SP carbon black as conductive agent) testing at 10 mV s–1.

Supplementary Figure.5 shows the CV curve of Co(OH)2 electrode testing at 10 mV s–1 after the addition of SP. In particular, we can see that the CV curve shows a pair of obvious redox peaks. And the position of the redox peaks has a small shift to the direction of anodic and cathodic, which is related to the decrease of polarization. At the same time, the Co(OH)2 electrode with the addition of SP exhibits the larger integral area and higher peak current, suggesting a higher capacitive property.





**Supplementary Figure. 6:** Cycling performance of Co(OH)2 (PVDF as binder and SP carbon black as conductive agent) at the current density of 20 A g–1 and GCD curves of the last ten cycles during 2000 cycles.

Compared with the Co(OH)2 electrode without SP, the cyclic stability of the Co(OH)2 electrode with SP was still about 100% after 2000 cycles. The insert shows that after 2000 cycles, the charge and discharge curves still maintain the ideal triangular shape.

**
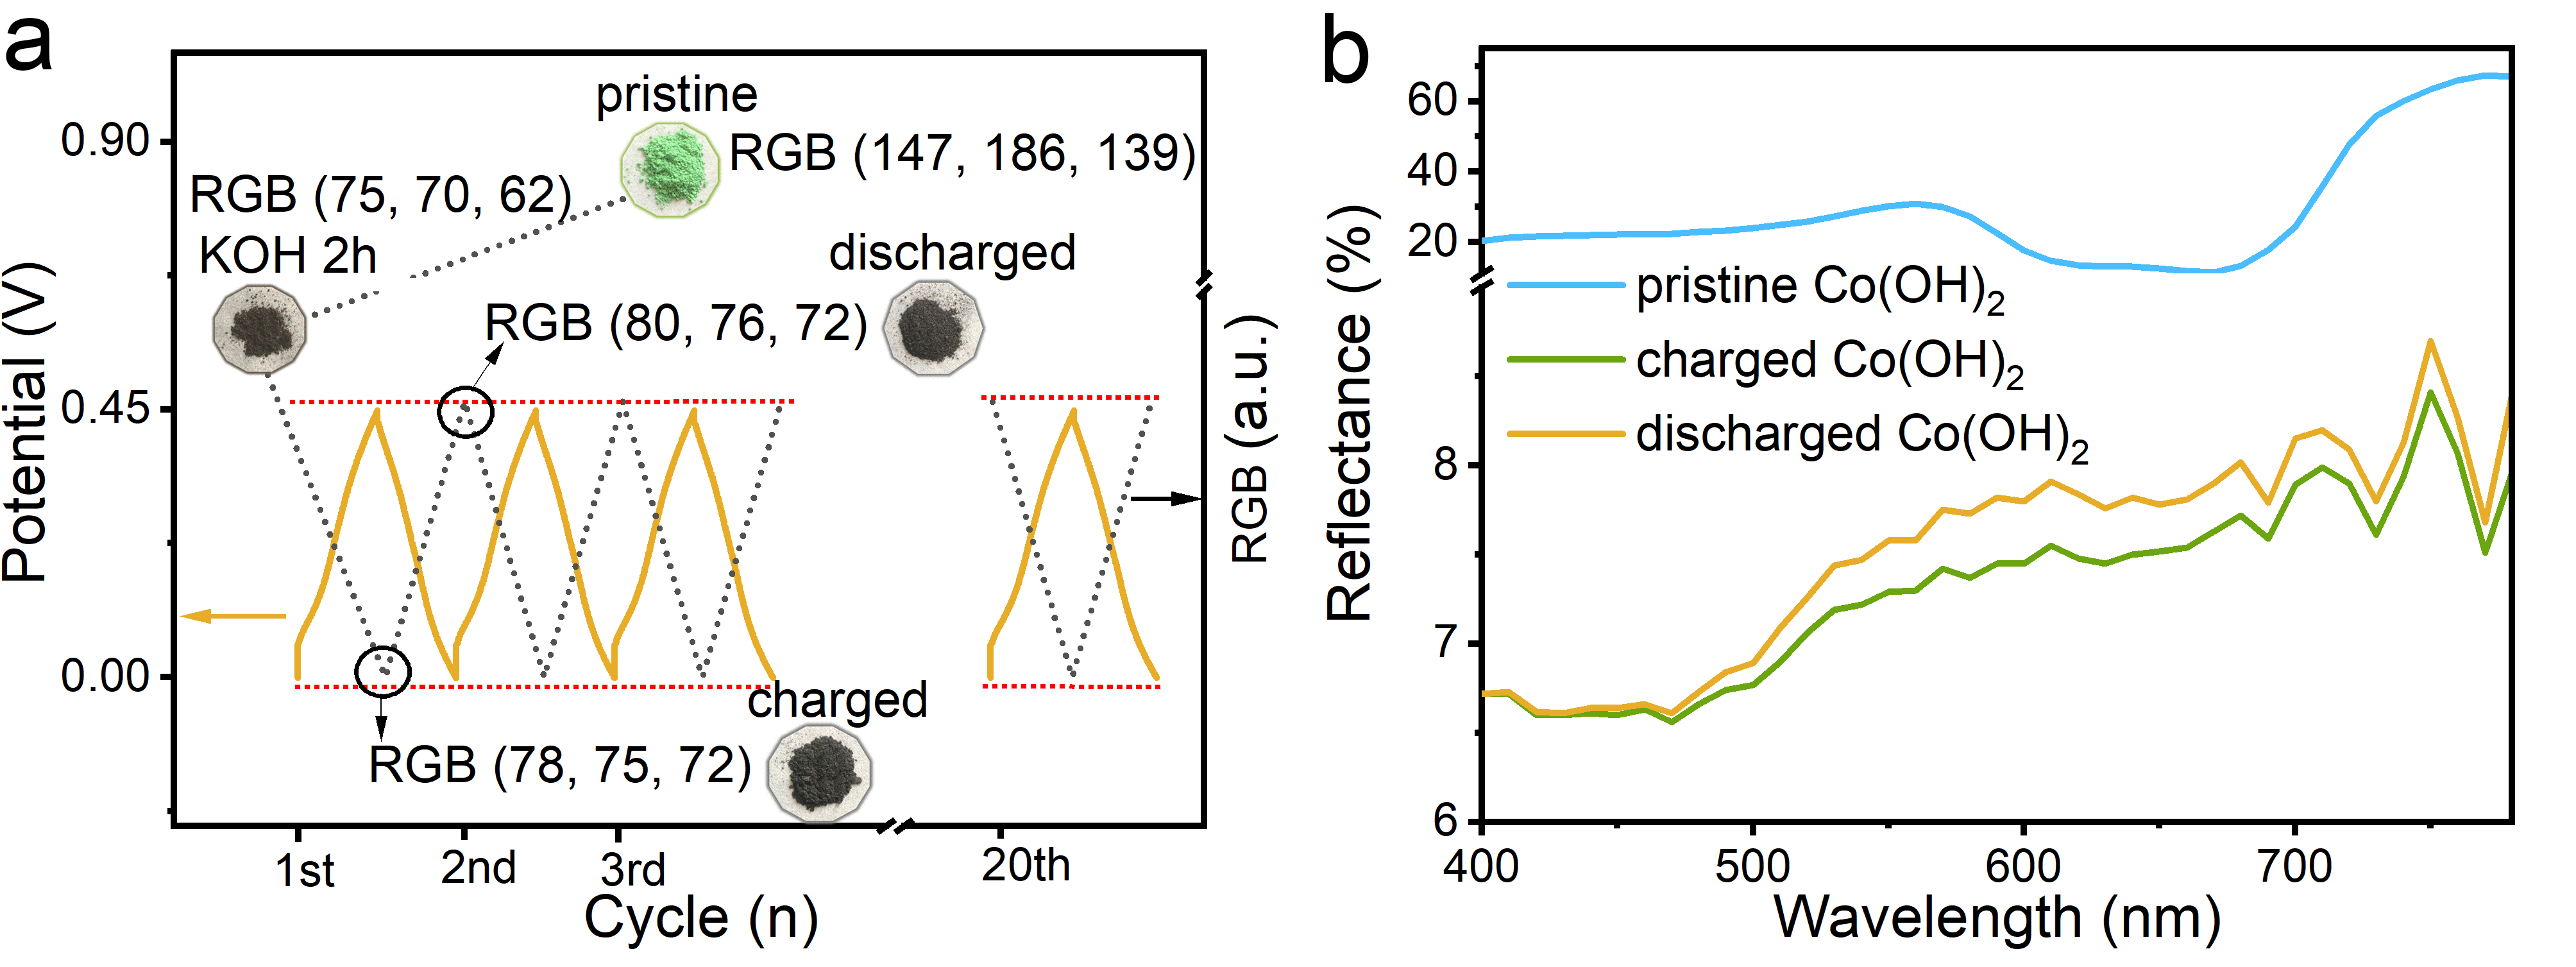
**

**Supplementary Figure. 7:** (a) Evaluation of Co(OH)2 electrode (PVDF as binder and SP carbon black as conductive agent) by Galvanostatic charge/discharge curves testing at a current density of 1A g–1 and the corresponding regular variations of color RGB value of discharged and charged Co(OH)2 powders. (b) Reflectivity of pristine, discharged and charged Co(OH)2 samples in relation to emitted wavelength.

For Co(OH)2 +PVDF+SP electrode, its RGB values and optical images also vary regularly with the GCD curves. With the introduction of ions, Co(OH)2 was oxidized to CoOOH, which leads the color of charged Co(OH)2 electrode varying to the RGB value (78, 75, 72). For Co(OH)2 electrode discharging to 0 V, the ions were taken off from the interlayer. The corresponding RGB value of the discharged (Co(OH)2 electrode was recovered to (80, 76, 72) again. The reflectivity of pristine, discharged and charged Co(OH)2+PVDF+SP samples shows very similar trends with Figure 1b in main text.


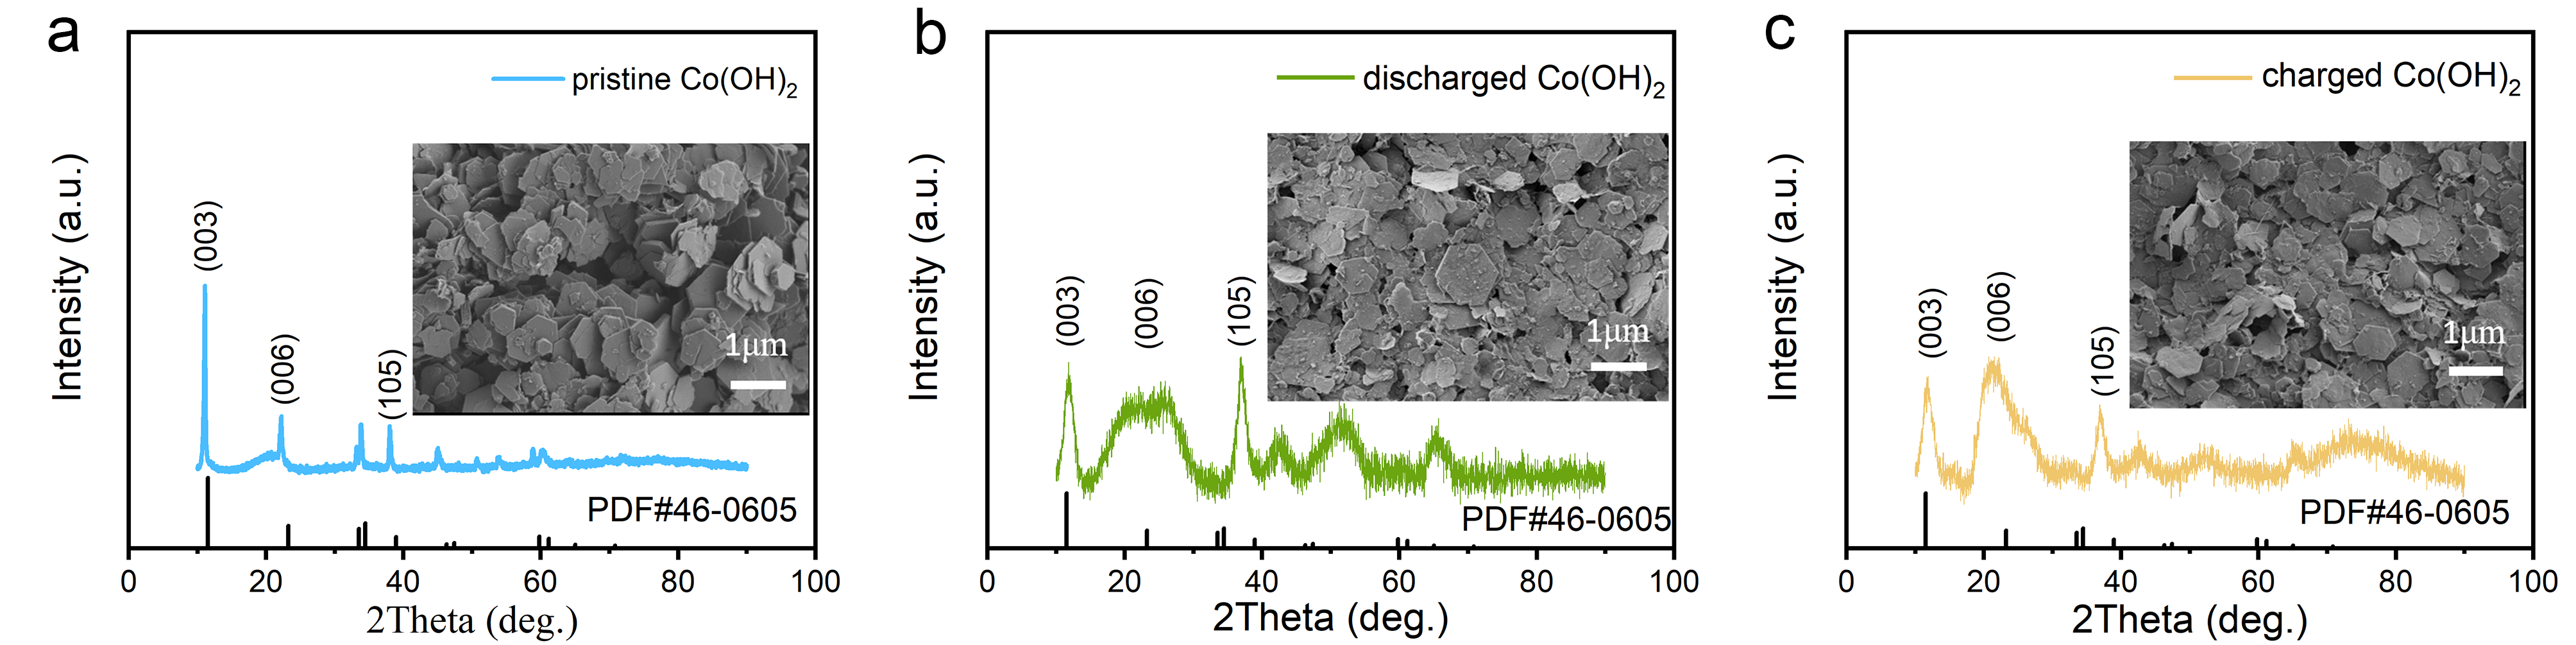


**Supplementary Figure. 8:** (a-c) XRD partens and SEM images of Co(OH)2, discharged Co(OH)2, and charged Co(OH)2 samples.

The morphologies of the three Co(OH)2 samples, as observed by field-emission scanning electron microscopy (FE-SEM), all show in hexagonal sheet structure, consisting with other reports. No apparent XRD and SEM variations were observed from pristine to discharged and charged Co(OH)2.


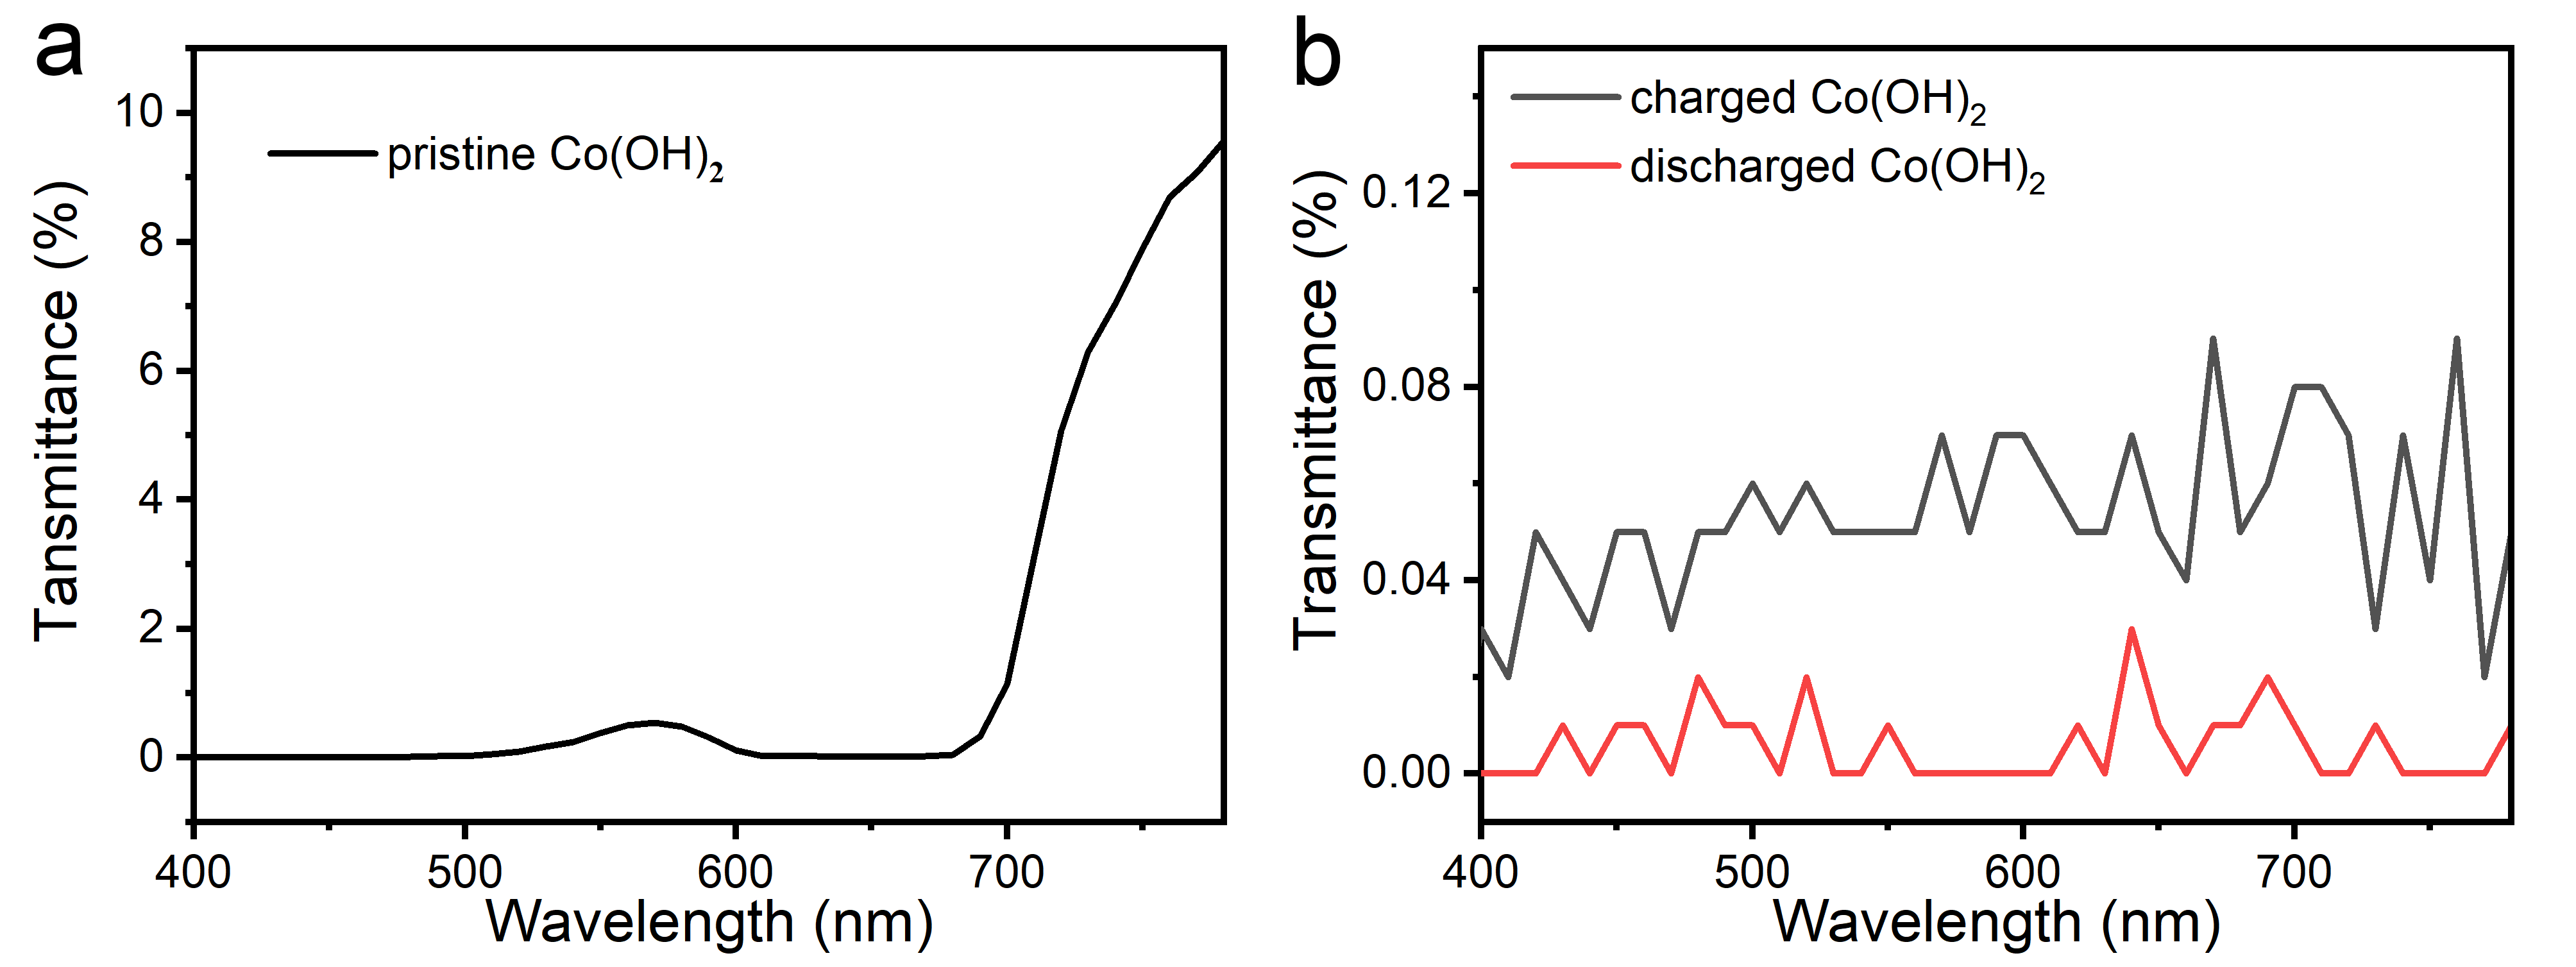


**Supplementary Figure. 9:** The transmissivity of pristine Co(OH)2、charged Co(OH)2 and discharged Co(OH)2

To measure the light transmittance, 90 wt% Co(OH)2 and 10 wt% PVDF are coated on FTO conductive glass to form a thin and uniform film as working electrode, which ensures the transmission of light. The electrode is charged and discharged to 0.45 and 0 V, and then the transmittance is measured after drying. The transmittance of pristine Co(OH)2 varies between 1-10%, while charged Co(OH)2 and discharged Co(OH)2 transmissivity was less than 0.1%. The significantly higher transmittance for pristine Co(OH)2 means larger band gap (for exciting light passing through) than discharged and charged Co(OH)2.


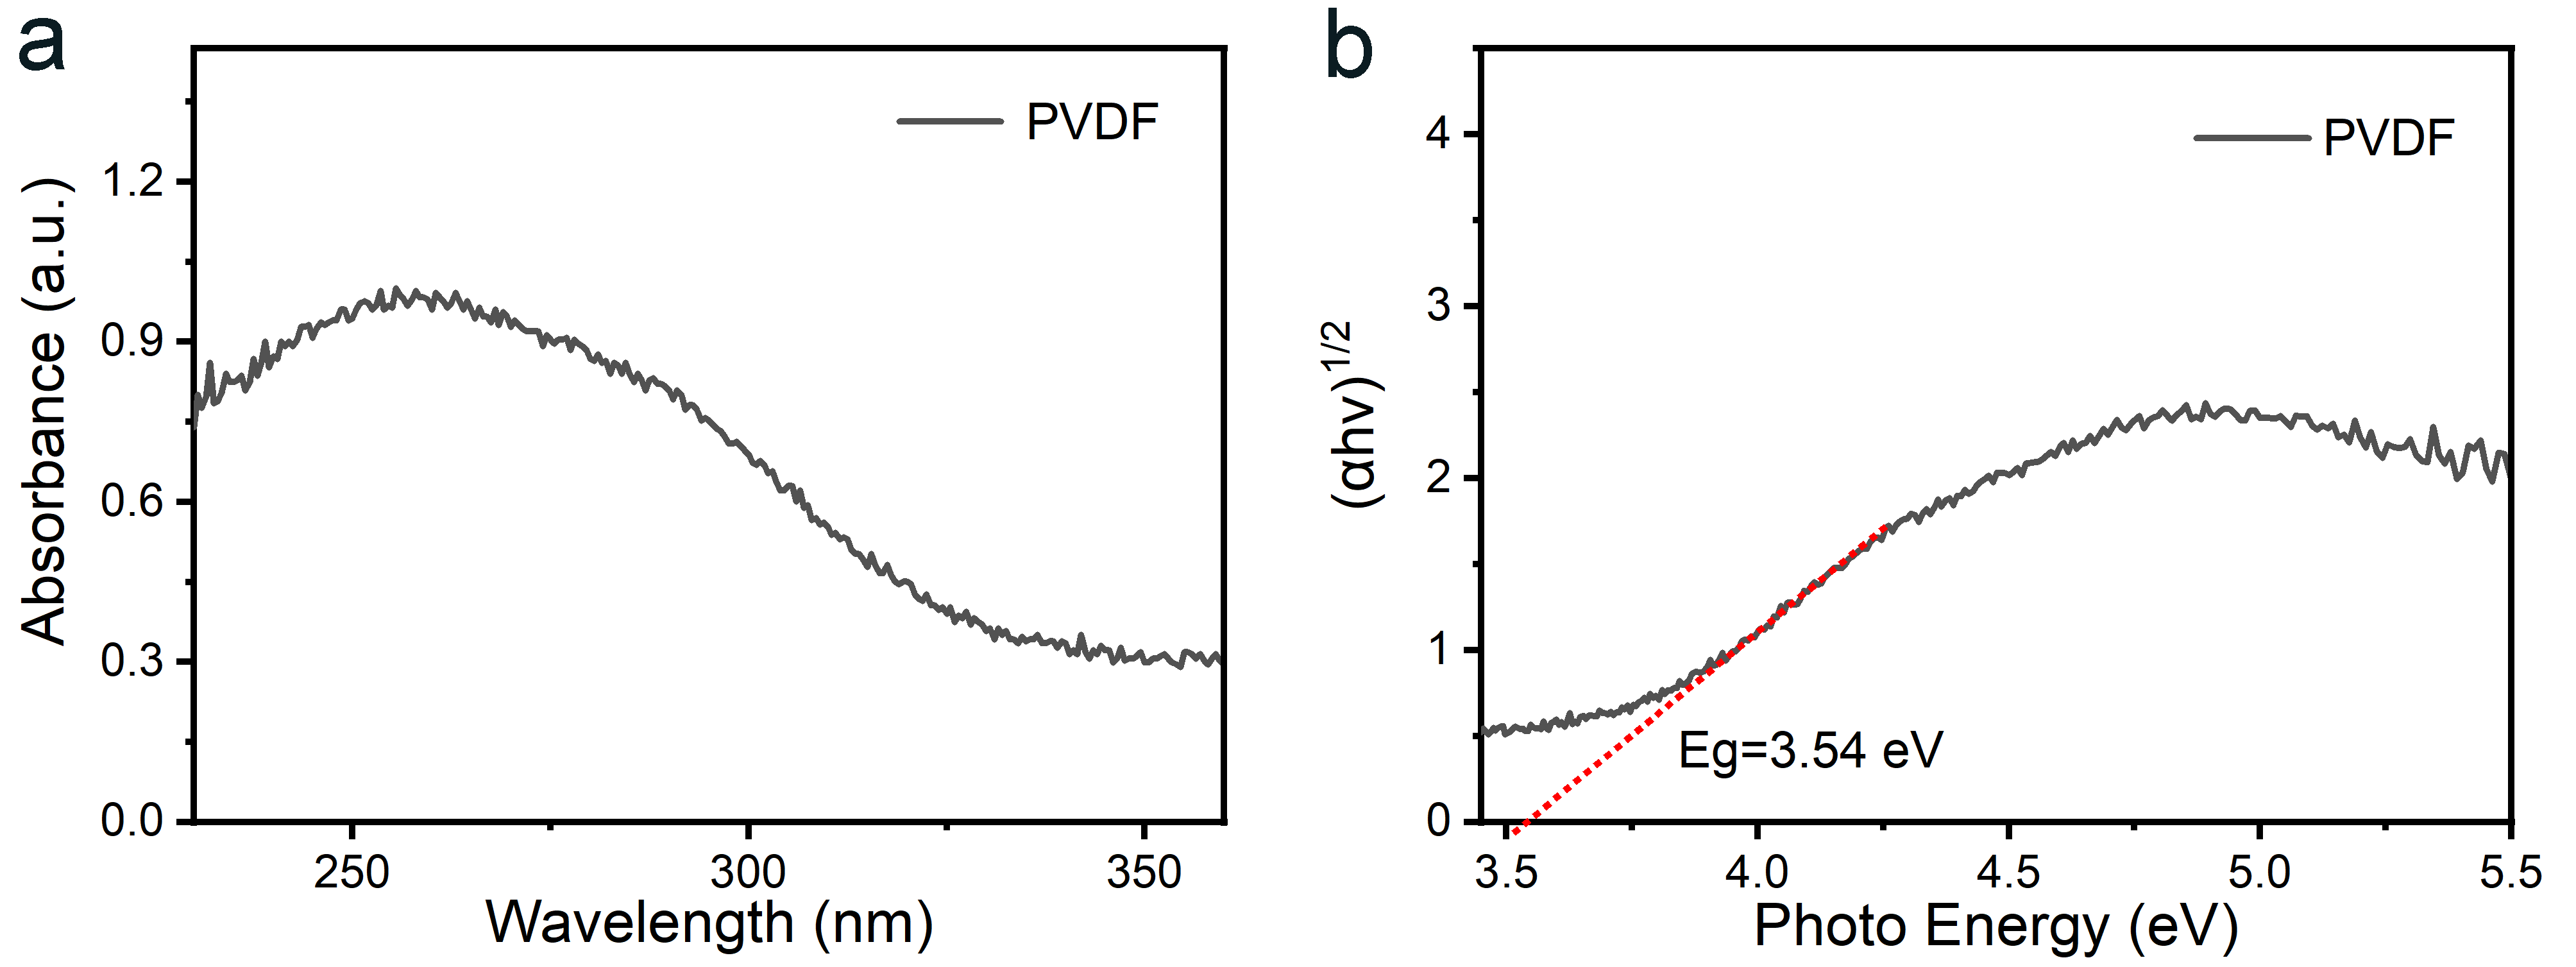


**Supplementary Figure. 10:** (a) UV-vis diffuse reflectance spectra of PVDF (b) Tauc plot of PVDF

Supplementary Figure. 10 shows the strong absorption peaks at 350 nm in the UV region due to excitonic absorption of PVDF, and no other absorption peak is shown in the visible region. Furtherly, the *Eg* value of PVDF can be obtained as 3.54 eV by Tauc plot.


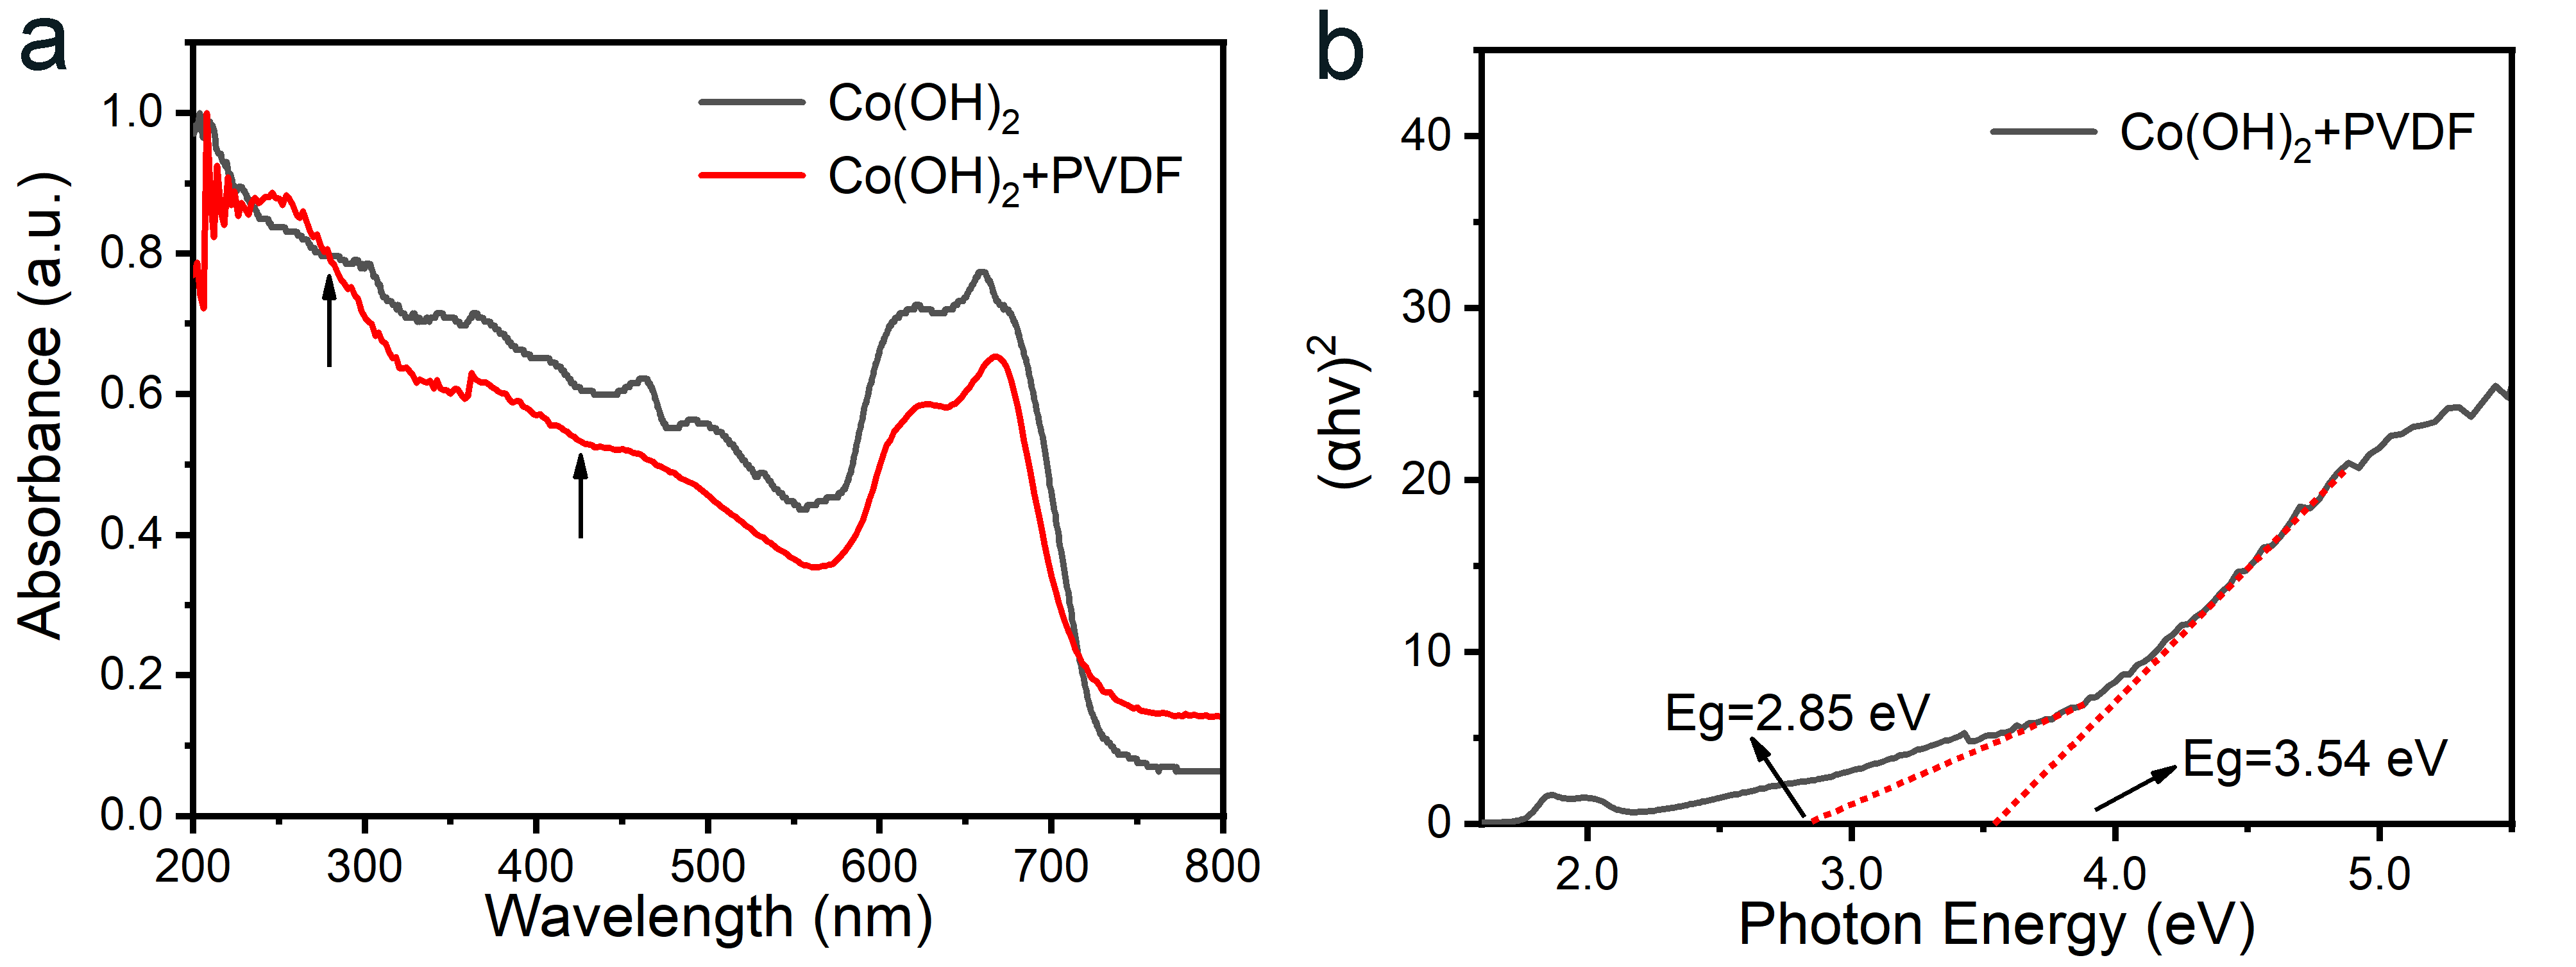


**Supplementary Figure. 11:** (a) UV-vis diffuse reflectance spectra of Co(OH)2 and Co(OH)2+PVDF (b) Tauc plots

Supplementary Figure. 11 represents the comparison of the UV-vis curves between Co(OH)2 and Co(OH)2 +PVDF. Co(OH)2 and PVDF were evenly mixed at a ratio of 1:1. The UV-vis absorption spectrum of Co(OH)2 + PVDF powder show the absorption peak of PVDF at 350 nm and the peak of Co(OH)2 at 435 nm. And the calculated UV-vis spectra of Co(OH)2 +PVDF electrode shows two individual *Eg* values at 3.54 and 2.85 eV, which means the *Eg*values of Co(OH)2 samples are unaffected by the introduction of PVDF binder.


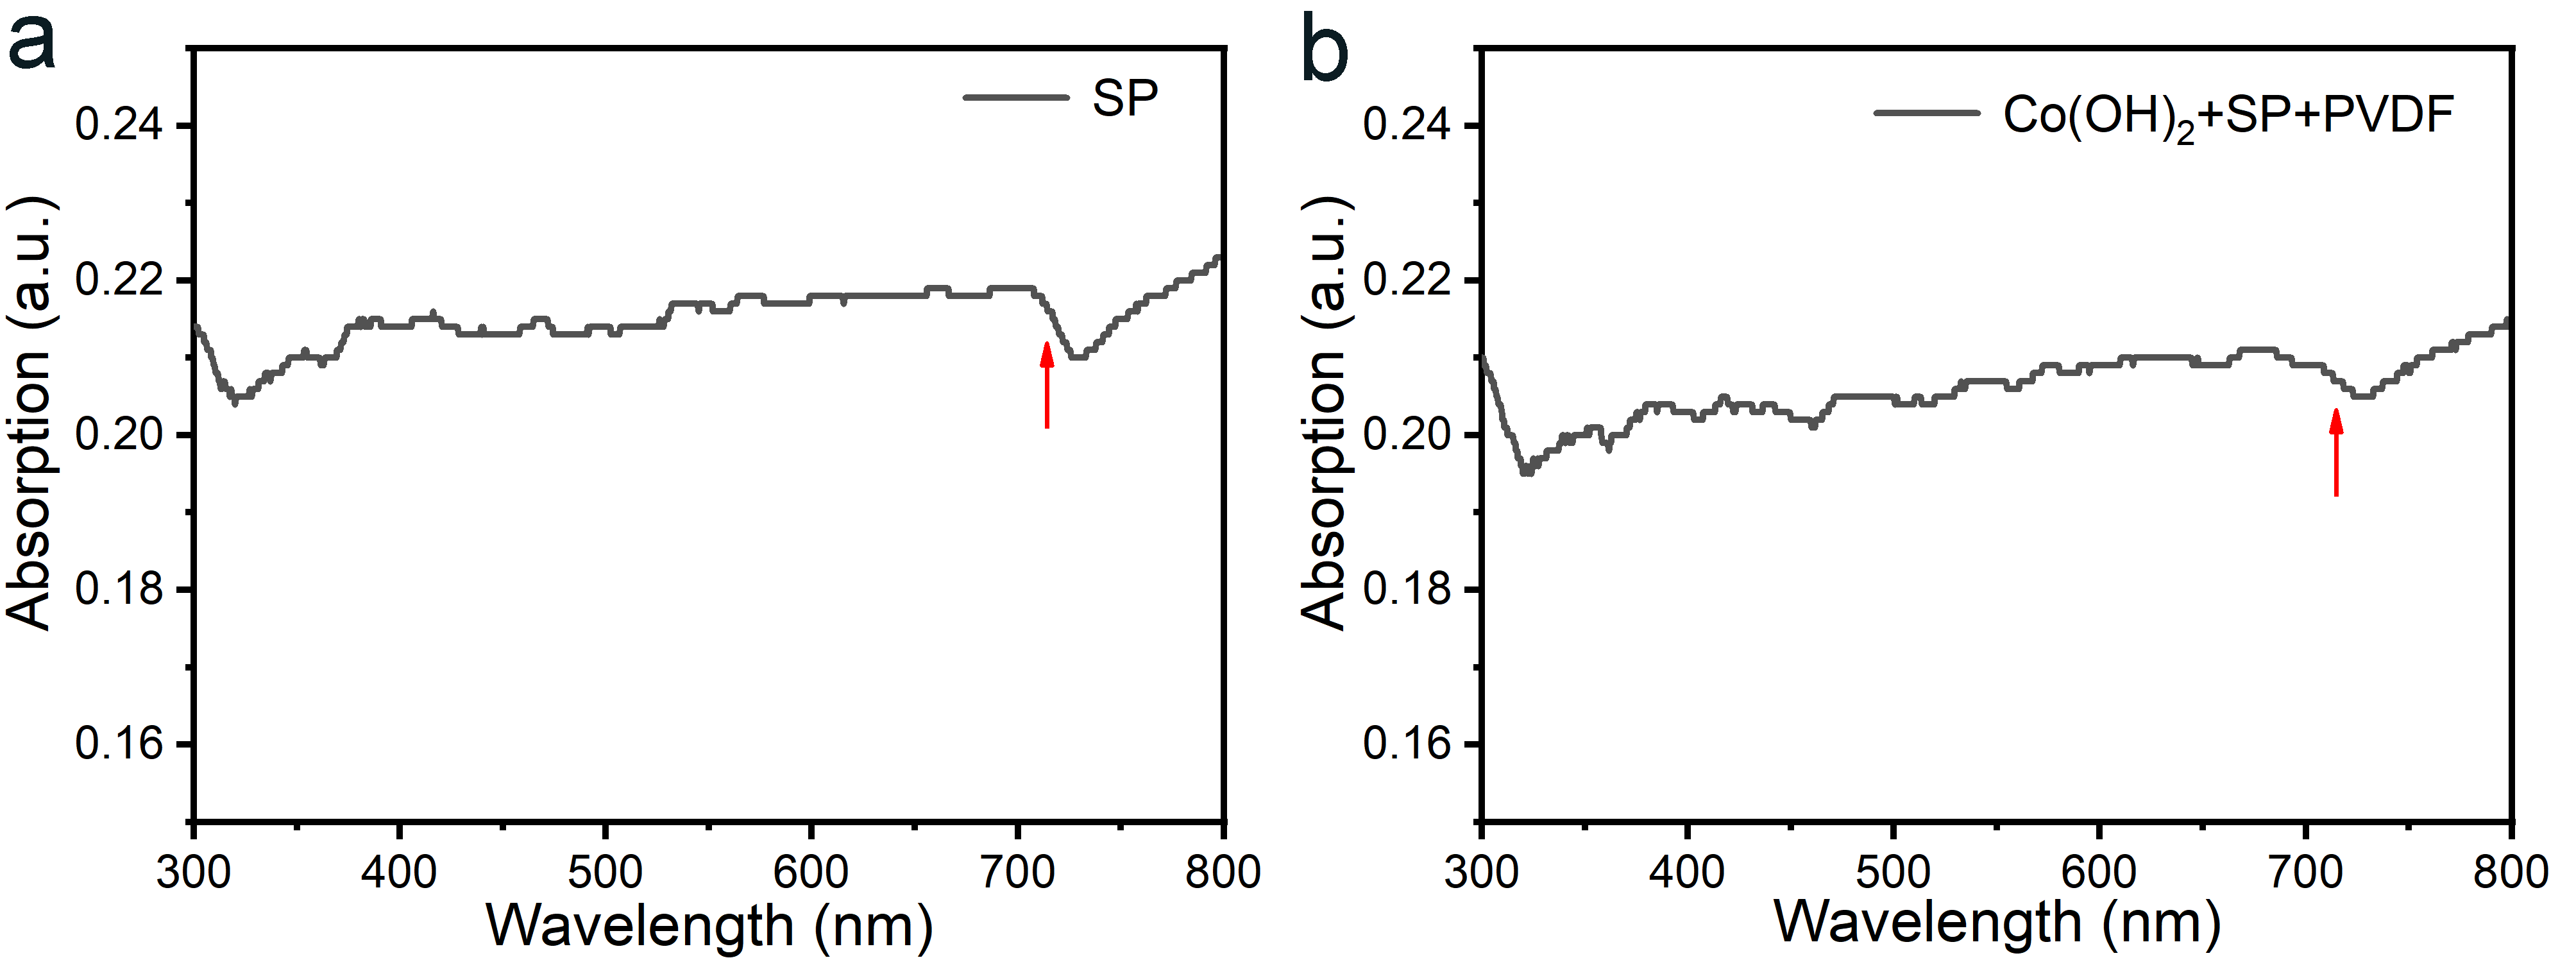


**Supplementary Figure. 12:** UV-vis diffuse reflectance spectra of SP (a) and Co(OH)2+SP+PVDF (b)

Supplementary Figure.12(a) shows the absorption spectrum of SP. Since SP is a conductive material, the absorption peak cannot be detected. The peak at 700 nm was generated by the instrument itself during the test. For Co(OH)2 +PVDF+SP electrode, as shown in Supplementary Figure.12(b), the absorption peaks of Co(OH)2 and PVDF are covered by the introduced SP carbon black. Herein, the optical spectroscopy was conducted with Co(OH)2 +PVDF as working electrode.


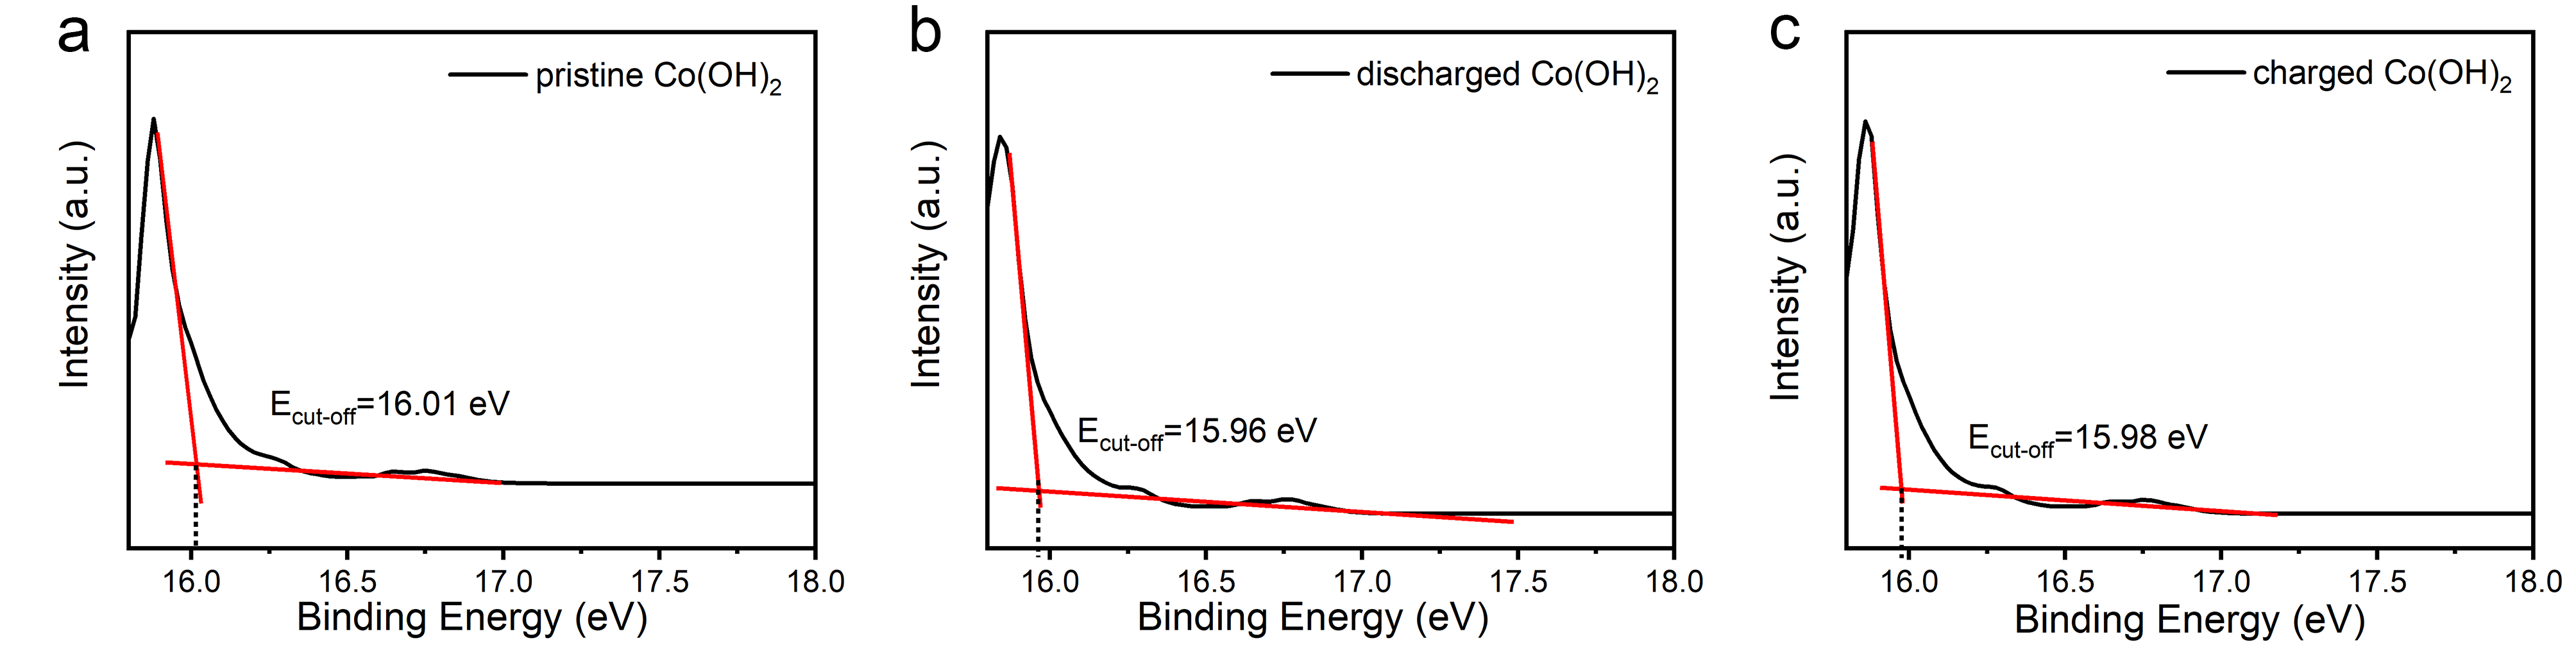


**Supplementary Figure. 13:** High-band energy slope of the Ultraviolet photon electron spectroscopy spectra for (a) pristine (b) discharged, and (c) charged Co(OH)2 samples.

The cut-off energy of the pristine, discharged and charged Co(OH)2 is 16.01, 15.96 and 15.98 eV, respectively.

**Supplementary Table S1.**

| **Sample** | **Co3+** | **Co2+** | **Sat.** | **Sum** | **Co3+** | **Co2+** | **Co2+/Co3+** |
| --- | --- | --- | --- | --- | --- | --- | --- |
| Co(OH)2 | 133302.7 | 185747.9 | 170198.8 | 489249.4 | 27.2% | 37.9% | 1.39 |
| Co(OH)2 charged | 132120.1 | 65843.65 | 39619.67 | 23753.42 | 55.1% | 29.1% | 0.53 |
| Co(OH)2  discharged | 64851.28 | 134554.9 | 50828.08 | 250234.26 | 25.7% | 53.3% | 2.07 |

**Sample preparation for pristine/discharged/charged Co(OH)2**

**SEM, XRD, XPS, UV-vis, UPS test:** First, put a certain mass of Co(OH)2 and the binder PVDF into a mortar at a ratio of 9:1, add a few drops of 1-Methyl-2-pyrrolidinone (NMP), and grind for 15 minutes until the mixture is uniform and fluid. It was then coated on conductive glass FTO (3×3 cm2) to form a uniform thin layer and dried in an oven at 75 oC for 12 h. The prepared Co(OH)2 electrode was used as the working electrode, the Pt foil was used as the counter electrode, and the Ag/AgCl was used as the reference electrode. The LANHE battery test system was used to charge and discharge at a current density of 5 A g–1 in a 2M KOH solution. When the voltage increases to 0.45 V during charging process, stop the LANHE battery test channel and remove the Co(OH)2 electrode sheet; when the voltage drops to 0V during discharging process, stop the LANHE battery test channel. After charging and discharging, the surface of the Co(OH)2 electrode sheet was gently rinsed with deionized water and absolute ethanol, and then dried in an oven at 75 oC for 12 h. Then, the charged and discharged Co(OH)2 was gently scraped off the conductive glass and ground to obtain uniform powders. The pristine, discharged and charged Co(OH)2 powders were used for SEM, XRD, XPS and UV-vis tests. The UPS test was also prepared by coating Co(OH)2 on the conductive glass, which was 0.5×1 cm2 in size due to the sample preparation requirements of the test.

**Mott-Schottky test:** For Mott-Schottky test, a certain mass of Co(OH)2 was mixed with the binder PVDF into a mortar at a ratio of 9:1, ground evenly with a few drops of NMP and coated on nickel foam (1×2 cm2), then dried in an oven at 75 oC and then pressed at 10 MPa for 10 s. The prepared Co(OH)2 electrode was used as the working electrode, the Pt foil was used as the counter electrode, the Ag/AgCl was used as the reference electrode, and the 2M KOH solution was used as the electrolyte. The voltage range during the test is –0.45-0.5 V, and the frequency is 1000 Hz.

**RGB test:** When testing the RGB color change of Co(OH)2 during charging and discharging process, a certain mass of Co(OH)2 and PVDF were grinded with a few drops of NMP at a ratio of 9:1 and coated on nickel foam, dried in an oven at 75 oC, and then pressed at 10 MPa for 10 s. A three-electrode system is also used, with Co(OH)2 electrode as working electrode, Pt foil as counter electrode, and Ag/AgCl as reference electrode. The 2M KOH electrolyte solution was placed in a square transparent glass vessel and the charge-discharge process was performed in 2M KOH solution at a current density of 5 A g–1 by LANHE battery test system. The nickel foam Co(OH)2 electrode in the three-electrode system is placed in front of the reflection port of the Spectrophotometer colorimeter, so that the light of the Spectrophotometer colorimeter can be completely transmitted, and the color RGB changes during the charging and discharging process are recorded. At this time, the Spectrophotometer colorimeter is set for reflection mode.

**Reflection test:** Pristine Co(OH)2 powder was pressed into a disc with a diameter of 8 mm under a pressure of 4 MPa by a tableting machine, placed on the reflection port of the Spectrophotometer colorimeter, and the reflectance at different wavelengths was measured after light transmission. The reflectance of discharged Co(OH)2 and charged Co(OH)2 at different wavelengths is recorded by the Spectrophotometer colorimeter during charging and discharging process.

**Transmission test:** The pristine Co(OH)2 powders were coated on conductive glass FTO (3×3 cm2) according to the same method. When the Co(OH)2 electrode was charged to 0.45 V and discharged to 0 V in 2M KOH solution, the surface of Co(OH)2 electrode was gently rinsed with deionized water and then placed in an oven at 75 oC and dried for 12 h. The pristine, discharged and charged Co(OH)2 conductive glass sheets are placed at the transmission aperture of the Spectrophotometer colorimeter, so that the light of the Spectrophotometer colorimeter can completely pass through the material, and the transmittance to light at different wavelengths is measured in transmission mode.
